# Supplementary material for: Epidemiology and Seasonality of Endemic Human Coronaviruses in South African and Zambian Children: A Case-Control Pneumonia Study
Source: MDPI journal article supplement (doi:10.3390/v13081513), 2021-07-31
Supplement: s1 [file s1]

**Table S1:** Number of study subjects enrolled and tested for HCoV - percent positive by site of enrolment.

| Site                    | N (%)                             |          | Total                        | HIV+                         | HIV-                         |
|-------------------------|-----------------------------------|----------|------------------------------|------------------------------|------------------------------|
| Soweto,<br>South Africa | Enrolled                          | Cases    | 920                          | 115                          | 805                          |
|                         |                                   | Controls | 964                          | 136                          | 822                          |
|                         | HCoV <sup>f</sup>                 | Cases    | 65 (7)                       | 5 (4)                        | 60 (8)                       |
|                         |                                   | Controls | 104 (11)                     | 15 (11)                      | 88 (11)                      |
|                         | Asymptomatic control <sup>a</sup> |          | <i>p</i> =0.005 <sup>c</sup> | <i>p</i> =0.051 <sup>c</sup> | <i>p</i> =0.026 <sup>c</sup> |
|                         |                                   |          | 101 (11)                     | 15 (11)                      | 85 (11)                      |
|                         |                                   |          | <i>p</i> =0.001 <sup>d</sup> | <i>p</i> =0.037 <sup>d</sup> | <i>p</i> =0.018 <sup>d</sup> |
|                         | RTI control <sup>b</sup>          |          | 3 (6)                        | 0                            | 3 (7)                        |
|                         |                                   |          | <i>p</i> =0.698 <sup>e</sup> | <i>p</i> =0.547 <sup>e</sup> | <i>p</i> =0.826 <sup>e</sup> |
| Lusaka,<br>Zambia       | Enrolled                          | Cases    | 617                          | 103                          | 511                          |
|                         |                                   | Controls | 686                          | 85                           | 597                          |
|                         | HCoV <sup>f</sup>                 | Cases    | 39 (7)                       | 11 (12)                      | 28 (6)                       |
|                         |                                   | Controls | 60 (11)                      | 6 (8)                        | 53 (10)                      |
|                         | Asymptomatic control <sup>a</sup> |          | <i>p</i> =0.113 <sup>c</sup> | <i>p</i> =0.377 <sup>c</sup> | <i>p</i> =0.033 <sup>c</sup> |
|                         |                                   |          | 54 (10)                      | 3 (8)                        | 50 (10)                      |
|                         |                                   |          | <i>p</i> =0.069 <sup>d</sup> | <i>p</i> =0.462 <sup>d</sup> | <i>p</i> =0.021 <sup>d</sup> |
|                         | RTI control <sup>b</sup>          |          | 6 (7)                        | 3 (8)                        | 3 (6)                        |
|                         |                                   |          | <i>p</i> =0.864 <sup>e</sup> | <i>p</i> =0.518 <sup>e</sup> | <i>p</i> =0.892 <sup>e</sup> |

Abbreviations: n: number; HCoVs: Human coronaviruses; HIV: Human immunodeficiency virus; RTI: Respiratory tract infections

a – Asymptomatic controls were controls presenting with no obvious signs or symptoms of respiratory tract infections at the time of sample collection

b – Controls were considered to have RTI if they had 1) cough or runny nose, or 2) one of the following signs, ear discharge, wheeze, or difficulty breathing, in the presence of sore throat or fever (temperature  $\geq 38.0^{\circ}\text{C}$  or reported fever in the past 48 hours).

c - *p*-values adjusted for age in months comparing the HCoV prevalence among cases and controls.

d - *p*-values adjusted for age in months comparing the HCoV prevalence among cases and asymptomatic controls.

e - *p*-values adjusted for age in months comparing the HCoV prevalence among cases and RTI controls.

f - any HCoV species (OC43 and/or NL63 and/or E229 and/or HKU1).

**Table S2:** Number of study subjects enrolled and tested for the four endemic HCoV species.

| N (%) | Cases<br>(n=1447) | RTI                              |                                                | P-value <sup>c</sup> | P-value <sup>d</sup> |
|-------|-------------------|----------------------------------|------------------------------------------------|----------------------|----------------------|
|       |                   | controls <sup>a</sup><br>(n=142) | Asymptomatic<br>controls <sup>b</sup> (n=1424) |                      |                      |
| NL63  | 42 (3)            | 4 (3)                            | 66 (5)                                         | 0.954                | 0.110                |
| E229  | 8 (1)             | 0                                | 6 (0.5)                                        | 0.374                | 0.613                |
| HKU1  | 21 (1)            | 1 (1)                            | 40 (3)                                         | 0.467                | <b>0.017</b>         |
| OC43  | 36 (2)            | 4 (3)                            | 49 (3)                                         | 0.811                | 0.132                |

Abbreviations: n: number; HCoVs: Human coronaviruses; HIV: Human immunodeficiency virus; RTI: Respiratory tract infections

a – Asymptomatic controls were controls presenting with no obvious signs or symptoms of respiratory tract infections at the time of sample collection

b – Controls were considered to have RTI if they had 1) cough or runny nose, or 2) one of the following signs, ear discharge, wheeze, or difficulty breathing, in the presence of sore throat or fever (temperature  $\geq 38.0^{\circ}\text{C}$  or reported fever in the past 48 hours).

c - *p*-values adjusted for age in months and site on enrolment comparing the HCoV prevalence among cases and RTI controls.

d - *p*-values adjusted for age in months and site of enrolment comparing the HCoV prevalence among cases and asymptomatic controls.

**Table S3:** Number of study subjects enrolled and tested for HCoV - percent positive by age and HIV-1 infection status.

| Age group    |                       |          | Total<br>N (%)               | HIV+<br>N (%)                | HIV-<br>N (%)                |                              |
|--------------|-----------------------|----------|------------------------------|------------------------------|------------------------------|------------------------------|
| 1-5 months   | Enrolled              | Cases    | 741                          | 94                           | 647                          |                              |
|              |                       | Controls | 636                          | 65                           | 566                          |                              |
|              | HCoV <sup>c</sup>     | Cases    | 59 (8)                       | 8 (9)                        | 51 (8)                       |                              |
|              |                       | Controls | 66 (10)                      | 6 (9)                        | 59 (10)                      | <i>p</i> =0.41 <sup>b</sup>  |
|              | AlphaCoV <sup>d</sup> | Cases    | <i>p</i> =0.123 <sup>a</sup> | <i>p</i> =0.773 <sup>a</sup> | <i>p</i> =0.127 <sup>a</sup> |                              |
|              |                       | Controls | 23 (3)                       | 1 (1)                        | 22 (3)                       |                              |
|              | BetaCov <sup>e</sup>  | Cases    | 29 (5)                       | 1 (2)                        | 28 (5)                       | <i>p</i> =0.639 <sup>b</sup> |
|              |                       | Controls | <i>p</i> =0.174 <sup>a</sup> | <i>p</i> =0.560 <sup>a</sup> | <i>p</i> =0.199 <sup>a</sup> |                              |
|              |                       | Cases    | 37 (5)                       | 7 (7)                        | 30 (5)                       |                              |
|              |                       | Controls | 38 (6)                       | 5 (8)                        | 32 (6)                       | <i>p</i> =0.717 <sup>b</sup> |
|              |                       |          | <i>p</i> =0.410 <sup>a</sup> | <i>p</i> =0.945 <sup>a</sup> | <i>p</i> =0.398 <sup>a</sup> |                              |
|              |                       |          |                              |                              |                              |                              |
| 6-11 month   | Enrolled              | Cases    | 357                          | 57                           | 300                          |                              |
|              |                       | Controls | 420                          | 58                           | 360                          |                              |
|              | HCoV <sup>c</sup>     | Cases    | 23 (6)                       | 3 (5)                        | 20 (7)                       |                              |
|              |                       | Controls | 45 (11)                      | 4 (7)                        | 41 (11)                      | <i>p</i> =0.703 <sup>b</sup> |
|              | AlphaCoV <sup>d</sup> | Cases    | <i>p</i> =0.038 <sup>a</sup> | <i>p</i> =0.625 <sup>a</sup> | <i>p</i> =0.038 <sup>a</sup> |                              |
|              |                       | Controls | 9 (3)                        | 1 (2)                        | 8 (3)                        |                              |
|              | BetaCov <sup>e</sup>  | Cases    | 17 (4)                       | 1 (2)                        | 16 (4)                       | <i>p</i> =0.501 <sup>b</sup> |
|              |                       | Controls | <i>p</i> =0.242 <sup>a</sup> | <i>p</i> =0.859 <sup>a</sup> | <i>p</i> =0.228 <sup>a</sup> |                              |
|              |                       | Cases    | 14 (4)                       | 2 (4)                        | 12 (4)                       |                              |
|              |                       | Controls | 31 (7)                       | 3 (5)                        | 28 (8)                       | <i>p</i> =0.735 <sup>b</sup> |
|              |                       |          | <i>p</i> =0.043 <sup>a</sup> | <i>p</i> =0.648 <sup>a</sup> | <i>p</i> =0.045 <sup>a</sup> |                              |
|              |                       |          |                              |                              |                              |                              |
| 12-59 months | Enrolled              | Cases    | 349                          | 53                           | 295                          |                              |
|              |                       | Controls | 510                          | 87                           | 420                          |                              |
|              | HCoV <sup>c</sup>     | Cases    | 22 (6)                       | 5 (10)                       | 17 (6)                       |                              |
|              |                       | Controls | 53 (10)                      | 11 (13)                      | 41 (10)                      | <i>p</i> =0.917 <sup>b</sup> |
|              | AlphaCoV <sup>d</sup> | Cases    | <i>p</i> =0.038 <sup>a</sup> | <i>p</i> =0.561 <sup>a</sup> | <i>p</i> =0.054 <sup>a</sup> |                              |
|              |                       | Controls | 12 (3)                       | 4 (8)                        | 8 (3)                        |                              |
|              | BetaCov <sup>e</sup>  | Cases    | 13 (2)                       | 2 (2)                        | 10 (2)                       | <i>p</i> =0.539 <sup>b</sup> |
|              |                       | Controls | <i>p</i> =0.429 <sup>a</sup> | <i>p</i> =0.157 <sup>a</sup> | <i>p</i> =0.768 <sup>a</sup> |                              |
|              |                       | Cases    | 12 (3)                       | 2 (4)                        | 10 (3)                       |                              |
|              |                       | Controls | 42 (8)                       | 9 (10)                       | 32 (8)                       | <i>p</i> =0.504 <sup>b</sup> |
|              |                       |          | <i>p</i> =0.005 <sup>a</sup> | <i>p</i> =0.177 <sup>a</sup> | <i>p</i> =0.020 <sup>a</sup> |                              |
|              |                       |          |                              |                              |                              |                              |

Abbreviations: n: number; HCoVs: Human coronaviruses; HIV: Human immunodeficiency virus; RTI: Respiratory tract infections.

a - *p*-values adjusted for age in months and site of enrolment where applicable, comparing the HCoV prevalence among cases and controls.

b - *p*-value adjusting for age in months and site of enrolment where applicable, comparing the HCoV prevalence HIV+ and HIV- cases and controls.

c - any HCoV species (OC43 and/or NL43 and/or E229 and/or HKU1).

d - *Alphacoronavirus*, HKU1-HCoV and OC43-HCoV.

e - *Betacoronavirus*, 229E-HCoV and NL63-HCoV.

**Table S4:** Characteristics of HCoV+ in HIV+ cases (N=16) and controls (N=21)

| Characteristics                                       | Cases<br>N(%) | Controls<br>N(%) | aOR (95%CI)      | p-<br>value <sup>a</sup> |
|-------------------------------------------------------|---------------|------------------|------------------|--------------------------|
| HCoV detected as single viral infections <sup>b</sup> | 8 (50)        | 14 (67)          | 0.27 (0.05-1.47) | 0.13                     |
| HCoV-OC43                                             | 8 (50)        | 11 (52)          | 1.05 (0.22-5.03) |                          |
| HCoV-NL63                                             | 5 (31)        | 3 (14)           | 4.15 (0.53-32.2) |                          |
| HCoV-E229                                             | 1 (5)         | 1 (6)            | 0.33 (0.12-8.96) | 0.513                    |
| HCoV-HKU1                                             | 3 (19)        | 6 (29)           | 0.52 (0.08-3.25) | 0.484                    |
| <u>Mixed infections with:</u>                         |               |                  |                  |                          |
| Two HCoV species <sup>c</sup>                         | 1 (6)         | 0                |                  | 0.245                    |
| RSV                                                   | 0             | 1 (%)            | -                | 0.376                    |
| RV                                                    | 3 (19)        | 3 (14)           | 1.21 (0.15-10.1) | 0.855                    |
| PIV (1-4)                                             | 0             | 0                | -                | -                        |
| HBoV                                                  | 5 (31)        | 4 (19)           | 7.81 (0.80-76.1) | 0.077                    |
| AdV                                                   | 3 (19)        | 0                |                  | <b>0.049</b>             |
| InFV (A,B and C)                                      | 0             | 0                | -                | -                        |
| HCoV load, mean (SD) <sup>d</sup>                     | 5.09 (1.43)   | 5.58 (1.60)      | -                | 0.35                     |
| <i>S. pneu</i> co-detected in NP/OP                   | 15 (94)       | 114 (67)         | 13.90 (1.51-168) | <b>0.038</b>             |
| <i>S. pneu</i> load, mean (SD) <sup>e</sup>           | 5.79 (1.51)   | 5.98 (1.03)      | -                | 0.692                    |
| HDP in nasopharynx <sup>f</sup>                       | 6 (38)        | 2 (10)           | 17.24 (1.31-227) | <b>0.03</b>              |
| <i>S. pneu</i> detected in WB                         | 1 (7)         | 1 (5)            | 1.42 (0.08-24.8) | 0.806                    |
| HDP in blood <sup>g</sup>                             | 0             | 0                | -                | -                        |

Abbreviations: HCoV: Human coronavirus; aOR: adjusted odds ratio; CI: Confidence interval; WB: whole blood; RV: Rhinovirus; RSV: Respiratory Syncytial Virus, HMPV: Human Metapneumovirus; PIV: Parainfluenza type 1-4; HBoV: Human Bocavirus; AdV: Adenovirus; InFV: Influenza Virus (A, B and C); *S. pneu*: *Streptococcus pneumoniae*; HDP: High density pneumococcus.

a - P-values and aOR from regression models adjusted for age in months, site of enrolment, and confounding covariates where applicable.

b - Human Coronavirus including either OC43, NL63, 229E or HKU1.

c - Human Coronavirus including OC43 and/or NL63 and/or 229E and/or HKU1.

d - HCoV viral load in the nasopharynx expressed as log<sub>10</sub> copies/mL.

e - *S. pneumoniae* bacterial load in the nasopharynx expressed as log<sub>10</sub> copies/mL.

f - HDP defined as *S. pneumoniae* density in nasopharynx >6.9 log<sub>10</sub> copies/mL.

g - HDP defined as *S. pneumoniae* density in whole blood >2.2 log<sub>10</sub> copies/mL.

**Table S5:** Characteristics of HCoV+ in HIV- cases (N=88) and controls (N=141)

| Characteristics                                       | Cases<br>N(%) | Controls<br>N(%) | aOR (95%CI)      | p-value <sup>a</sup> |
|-------------------------------------------------------|---------------|------------------|------------------|----------------------|
| HCoV detected as single viral infections <sup>b</sup> | 30 (34)       | 80 (57)          | 0.35 (0.20-0.64) | <b>&lt;0.001</b>     |
| HCoV-OC43                                             | 34 (39)       | 57 (40)          | 0.91 (0.51-1.61) | 0.735                |
| HCoV-NL63                                             | 31 (35)       | 49 (35)          | 0.94 (0.53-1.68) | 0.844                |
| HCoV-E229                                             | 7 (8)         | 5 (4)            | 2.59 (0.77-8.63) | 0.122                |
| HCoV-HKU1                                             | 18 (20)       | 35 (25)          | 0.86 (0.44-1.66) | 0.653                |
| Mixed infections with:                                |               |                  |                  |                      |
| Other HCoV type <sup>c</sup>                          | 2 (2)         | 5 (4)            | 0.68 (0.12-3.66) | 0.649                |
| RSV                                                   | 24 (27)       | 1 (1)            | 49.58 (6.49-379) | <b>&lt;0.001</b>     |
| RV                                                    | 17 (19)       | 27 (19)          | 0.97 (0.48-1.94) | 0.928                |
| PIV (1-4)                                             | 2 (2)         | 5 (4)            | 0.65 (0.12-3.64) | 0.623                |
| HBoV                                                  | 14 (16)       | 14 (10)          | 2.16 (0.94-4.97) | 0.071                |
| AdV                                                   | 11 (13)       | 11 (8)           | 2.10 (0.84-5.32) | 0.116                |
| InFV (A,B and C)                                      | 4 (5)         | 2 (1)            | 5.14 (0.77-34.5) | 0.092                |
| HCoV load, mean (SD) <sup>d</sup>                     | 5.32 (1.83)   | 5.25 (.71)       | -                | 0.773                |
| <i>S. pneu</i> co-detected in NP/OP                   | 59 (67)       | 108 (77)         | 0.68 (0.36-1.27) | 0.225                |
| <i>S. pneu</i> load, mean (SD) <sup>e</sup>           | 5.33 (1.32)   | 5.73 (1.18)      | -                | <b>0.034</b>         |
| HDP in nasopharynx <sup>f</sup>                       | 9 (10)        | 9 (6)            | 1.67 (0.624-4.9) | 0.308                |
| <i>S. pneu</i> detected in WB                         | 4 (5)         | 10 (7)           | 0.63 (0.18-2.15) | 0.455                |
| HDP in blood <sup>g</sup>                             | 0             | 0                | -                | -                    |

Abbreviations: HCoV: Human coronavirus; aOR: adjusted odds ratio; CI: Confidence interval; WB: whole blood; RV: Rhinovirus; RSV: Respiratory Syncytial Virus, HMPV: Human Metapneumovirus; AdV: adenovirus; PIV: Parainfluenza type 1-4; HBoV: Human Bocavirus; AdV: Adenovirus; InFV: Influenza Virus (A, B and C); *S. pneu*: *Streptococcus pneumoniae*; HDP: High density pneumococcus.

a - P-values and aOR from regression models adjusted for age in months, site of enrolment, and confounding covariates where applicable.

b - Human Coronavirus including either OC43, NL63, 229E or HKU1.

c - Human Coronavirus including OC43 and/or NL63 and/or 229E and/or HKU1.

d - HCoV viral load in the nasopharynx expressed as log<sub>10</sub> copies/mL.

e - *S. pneumoniae* bacterial load in the nasopharynx expressed as log<sub>10</sub> copies/mL.

f - HDP defined as *S. pneumoniae* density in nasopharynx >6.9 log<sub>10</sub> copies/mL.

g - HDP defined as *S. pneumoniae* density in whole blood >2.2 log<sub>10</sub> copies/mL.

**Table S6.** Demographic, clinical characteristics and markers of bacterial and respiratory viral co-infections among severe and very-severe pneumonia cases identified with Human coronavirus infection.

| Characteristics                     | Mono<br>HCoV <sup>a+</sup><br>(n=38)<br>N(%) | Mixed<br>HCoV <sup>b</sup><br>(n=66)<br>N(%) | HCoV-<br>(n=1338)<br>N(%) | p-<br>value <sup>c</sup> | p-<br>value <sup>d</sup> |
|-------------------------------------|----------------------------------------------|----------------------------------------------|---------------------------|--------------------------|--------------------------|
| <u>Demographics and health:</u>     |                                              |                                              |                           |                          |                          |
| Age (months), mean (SD)             | 6.5 (1.36)                                   | 8.8 (1.05)                                   | 8.9 (10.01)               | 0.148                    | 0.898                    |
| Male                                | 24 (63)                                      | 40 (61)                                      | 703 (52)                  | 0.176                    | 0.194                    |
| HIV                                 | 8 (21)                                       | 8 (12)                                       | 188 (14)                  | 0.292                    | 0.643                    |
| <u>Clinical features:</u>           |                                              |                                              |                           |                          |                          |
| Very severe pneumonia               | 11 (29)                                      | 26 (39)                                      | 428 (32)                  | 0.682                    | 0.206                    |
| Chest X-ray abnormal <sup>e</sup>   | 19 (51)                                      | 38 (62)                                      | 693 (54)                  | 0.314                    | 0.248                    |
| Hypoxic <sup>f</sup>                | 19 (51)                                      | 50 (76)                                      | 829 (62)                  | 0.253                    | <b>0.033</b>             |
| Tachycardia <sup>g</sup>            | 23 (61)                                      | 36 (55)                                      | 737 (55)                  | 0.688                    | 0.847                    |
| Tachypnea <sup>h</sup>              | 31 (84)                                      | 52 (80)                                      | 1081 (82)                 | 0.703                    | 0.793                    |
| Wheezing                            | 6 (16)                                       | 18 (27)                                      | 321 (24)                  | 0.630                    | 0.780                    |
| Convulsions                         | 1 (3)                                        | 1 (2)                                        | 38 (3)                    | 0.983                    | 0.577                    |
| Diarrhea                            | 7 (18)                                       | 9 (14)                                       | 238 (18)                  | 0.906                    | 0.356                    |
| Died in Hospital                    | 7 (23)                                       | 2 (4)                                        | 127 (9)                   | 0.551                    | 0.070                    |
| Fever <sup>i</sup>                  | 32 (84)                                      | 42 (63)                                      | 963 (72)                  | 0.072                    | 0.171                    |
| Leukocytosis <sup>j</sup>           | 52 (55)                                      | 30 (46)                                      | 34 (54)                   | 0.130                    | 0.866                    |
| Blood culture positive <sup>k</sup> | 5 (13)                                       | 3 (5)                                        | 47 (4)                    | <b>0.004</b>             | 0.639                    |
| MCPP <sup>l</sup>                   | 1 (3)                                        | 0                                            | 11 (1)                    | 0.140                    | 0.459                    |
| <u>Bacterial co-infections:</u>     |                                              |                                              |                           |                          |                          |
| <i>S. aureus</i>                    | 8 (21)                                       | 13 (20)                                      | 333 (25)                  | 0.351                    | 0.353                    |
| <i>S. pneumoniae</i>                | 28 (74)                                      | 46 (70)                                      | 919 (68)                  | 0.443                    | 0.785                    |
| <i>M. catarrhalis</i>               | 26 (68)                                      | 45 (68)                                      | 850 (63)                  | 0.370                    | 0.417                    |
| <i>B. pertussis</i>                 | 2 (5)                                        | 0                                            | 19 (1)                    | 0.143                    | 0.330                    |
| <i>H. influenzae</i>                | 17 (45)                                      | 35 (53)                                      | 669 (50)                  | 0.936                    | 0.721                    |
| <i>H. influenzae</i> type b         | 3 (8)                                        | 2 (3)                                        | 38 (3)                    | 0.081                    | 0.869                    |
| <i>M. pneumoniae</i>                | 0                                            | 1 (2)                                        | 7 (1)                     | 0.655                    | 0.317                    |
| <i>C. pneumoniae</i>                | 0                                            | 0                                            | 16 (1)                    | 0.498                    | 0.372                    |
| HDP in nasopharynx <sup>m</sup>     | 5 (13)                                       | 10 (15)                                      | 144 (11)                  | 0.631                    | 0.274                    |
| HDP in blood <sup>n</sup>           | 0                                            | 0                                            | 67 (5)                    | -                        | -                        |

Abbreviations: SD: standard deviation; CRP: C-reactive protein; MCPP: microbiologically confirmed pneumococcal pneumonia; *S. aureus*: *Staphylococcus aureus*; *S. pneu*: *Streptococcus pneumoniae*; *H. influenzae*: *Haemophilus influenzae*, *H. influenzae* type, *M. catarrhalis*: *Moraxella catarrhalis*. *B. pertussis*: *Bordetella pertussis*; *M. pneumoniae*: *Mycoplasma pneumoniae*; *C. pneumoniae*: *Chlamydia pneumoniae*;

a – HCoV (NL63, OC43, HKU1 and/or 229E) was the only respiratory virus detected in the nasopharynx.

b – HCoV (NL63, OC43, HKU1 and/or 229E) was detected as a mixed infection in the nasopharynx with other common respiratory viruses.

c - P-values from regression models comparing HCoV+ mono-infections compared to HCoV negative cases adjusted for age in months, site of enrollment and for confounding covariates where applicable where applicable.

d - P-values from regression models comparing HCoV+ mixed infections compared to HCoV negative cases adjusted for age in months, site of enrolment and for confounding covariates where applicable.

e – Abnormal Chest X-ray defined as radiographically confirmed end point pneumonia consolidation or any infiltrates.

f - A child was considered to be hypoxic if 1) a room air pulse-oximetry reading indicated oxygen saturation <90%, or 2) a room air oxygen saturation was not available and child was placed on supplemental oxygen.

g - Tachycardia defined as heart rate >160 beats per minute (bpm) if aged <11 months, heart rate >150 bpm if aged 12-35 months, heart rate >140 bpm if aged 36-59 months.

h - Tachypnea defined as respiratory rate ≥60 breaths/minute if aged <2 months, respiratory rate ≥50 breaths/minute if aged 2-12 months, respiration rate ≥40 breaths/minute if aged >12 month.

i - Fever defined as temperature ≥38°C.

j - Leukocytosis defined as white blood cell count >15 000 cells/uL if age <12 months or >13 000 cells/uL if age >12 months.

k - Blood culture positive for any non-contaminating bacteria.

l - MCPD defined as *S. pneumoniae* cultured from a normally sterile body fluid, including blood, pleural fluid or lung aspirate, or as pleural fluid or lung aspirate positive on PCR *LytA* testing.

m - HDP defined as *S. pneumoniae* density in nasopharynx >6.9 log<sub>10</sub> copies/mL.

n – HDP defined as *S.pneumoniae* density in whole blood >2.2 log<sub>10</sub> copies/mL.

**Table S7:** Demographic, clinical characteristics and markers of bacterial and respiratory viral co-infections among community controls identified with Human coronavirus infection

| Characteristics                                      | HCoV <sup>a+</sup><br>(n=164)<br>N(%) | AlphaCoV <sup>b</sup><br>(n=59)<br>N(%) | BetaCoV <sup>c</sup><br>(n=111)<br>N(%) | HCoV-<br>(n=1338)<br>N(%) | p-<br>value <sup>d</sup> | p-<br>value <sup>e</sup> | p-<br>value <sup>f</sup> |
|------------------------------------------------------|---------------------------------------|-----------------------------------------|-----------------------------------------|---------------------------|--------------------------|--------------------------|--------------------------|
| <u>Demographics and health</u>                       |                                       |                                         |                                         |                           |                          |                          |                          |
| Age (months), mean (SD)                              | 11.84(12.3)                           | 9.52(10.1)                              | 13.1 (12.9)                             | 11.96                     | 0.904                    | 0.127                    | 0.317                    |
| Male                                                 | 73 (45)                               | 30 (51)                                 | 46 (41)                                 | 697 (50)                  | 0.207                    | 0.776                    | 0.098                    |
| HIV                                                  | 21 (13)                               | 4 (7)                                   | 17 (15)                                 | 189 (13)                  | 0.601                    | 0.182                    | 0.195                    |
| <u>Clinical features:</u>                            |                                       |                                         |                                         |                           |                          |                          |                          |
| RTI control                                          | 9 (5)                                 | 4 (7)                                   | 5 (5)                                   | 133 (9)                   | 0.118                    | 0.401                    | 0.095                    |
| Fever                                                | 2 (1)                                 | 0                                       | 2 (2)                                   | 16 (1)                    | 0.930                    | 0.386                    | 0.557                    |
| Cough                                                | 5 (3)                                 | 2 (3)                                   | 3 (3)                                   | 64 (5)                    | 0.534                    | 0.808                    | 0.461                    |
| Rhinitis                                             | 2 (1)                                 | 2 (3)                                   | 0                                       | 42 (3)                    | 0.365                    | 0.942                    | 0.125                    |
| Ear discharge                                        | 0                                     | 0                                       | 0                                       | 7 (1)                     | 0.558                    | 0.832                    | 0.697                    |
| Vomiting                                             | 0                                     | 0                                       | 0                                       | 3 (0)                     | 0.706                    | 0.896                    | 0.806                    |
| Diarrhoea                                            | 2 (1)                                 | 1 (2)                                   | 1 (1)                                   | 12 (1)                    | 0.749                    | 0.794                    | 0.896                    |
| <u>Respiratory viral co-infections in the NP/OP:</u> |                                       |                                         |                                         |                           |                          |                          |                          |
| RSV                                                  | 2 (1)                                 | 1 (2)                                   | 1 (1)                                   | 49 (4)                    | 0.492                    | 0.491                    | 0.147                    |
| AdV                                                  | 11 (7)                                | 3 (5)                                   | 8 (7)                                   | 119 (8)                   | 0.434                    | 0.361                    | 0.665                    |
| HMPV                                                 | 4 (2)                                 | 1 (2)                                   | 3 (3)                                   | 43 (3)                    | 0.757                    | 0.549                    | 0.848                    |
| HBoV                                                 | 18 (11)                               | 1 (2)                                   | 17 (15)                                 | 143 (10)                  | 0.757                    | 0.065                    | 0.099                    |
| InFV A-C                                             | 2 (1)                                 | 0                                       | 2 (2)                                   | 34 (2)                    | 0.330                    | 0.243                    | 0.777                    |
| PIV                                                  | 5 (3)                                 | 3 (5)                                   | 2 (2)                                   | 69 (5)                    | 0.285                    | 0.233                    | 0.051                    |
| RV                                                   | 30 (18)                               | 11 (19)                                 | 21 (19)                                 | 289 (21)                  | 0.485                    | 0.737                    | 0.694                    |
| <u>Bacterial co-infections:</u>                      |                                       |                                         |                                         |                           |                          |                          |                          |
| <i>S. aureus</i>                                     | 23 (14)                               | 8 (14)                                  | 16 (15)                                 | 225 (16)                  | 0.514                    | 0.624                    | 0.698                    |
| <i>S. pneumoniae</i>                                 | 122 (75)                              | 44 (75)                                 | 83 (76)                                 | 1005(72)                  | 0.417                    | 0.671                    | 0.421                    |
| <i>M. catarrhalis</i>                                | 125 (77)                              | 45 (76)                                 | 86 (78)                                 | 953 (68)                  | <b>0.025</b>             | 0.219                    | 0.031                    |
| <i>B. pertussis</i>                                  | 1 (1)                                 | 1 (2)                                   | 0                                       | 3 (0)                     | 0.340                    | <b>0.026</b>             | 0.582                    |
| <i>H. influenzae</i>                                 | 78 (48)                               | 23 (39)                                 | 58 (53)                                 | 615 (44)                  | 0.344                    | 0.398                    | 0.066                    |
| <i>H. influenzae</i> type b                          | 3 (2)                                 | 0                                       | 3 (3)                                   | 22 (2)                    | 0.784                    | 0.322                    | 0.322                    |
| <i>M. pneumoniae</i>                                 | 3 (2)                                 | 0                                       | 3 (3)                                   | 3 (0)                     | <b>0.002</b>             | 0.627                    | <b>0.001</b>             |
| <i>C. pneumoniae</i>                                 | 5 (3)                                 | 0                                       | 5 (5)                                   | 18 (1)                    | 0.074                    | 0.339                    | <b>0.005</b>             |
| HDP in nasopharynx <sup>g</sup>                      | 11 (7)                                | 3 (5)                                   | 1 (2)                                   | 121 (9)                   | 0.402                    | 0.393                    | 0.396                    |
| HDP in blood <sup>h</sup>                            | 6 (4)                                 | 1 (2)                                   | 5 (5)                                   | 54 (4)                    | 0.903                    | 0.396                    | 0.668                    |

Abbreviations: SD: standard deviation; RSV: respiratory syncytial virus, HMPV: human metapneumovirus; AdV: adenovirus; PIV: parainfluenza type 1-4; HBoV: human bocavirus; HCoV: human coronavirus (OC43, NL63, 229E and HKU1); RV: rhinovirus; and InFV: influenza virus (A, B and C). *S. aureus*: *Staphylococcus aureus*; *S. pneu*: *Streptococcus pneumoniae*; *H. influenzae*: *Haemophilus influenzae*, *H. influenzae* type, *M. catarrhalis*: *Moraxella catarrhalis*. *B. pertussis*: *Bordetella pertussis*; *M. pneumoniae*: *Mycoplasma pneumoniae*; *C. pneumoniae*: *Chlamydia pneumoniae*.

a – HCoV includes cases positive for any of the four endemic species (NL63, OC43, HKU1, 229E).

b – AlphaCoV includes cases positive for NL63 and/or 229E.

c – BetaCoV includes cases positive for OC43 and/or HKU1.



d - *P*-values from regression models comparing HCoV positive compared to HCoV negative cases adjusted for age in months, site of enrollment and for confounding covariates where applicable.

e - *p*-values from regression models comparing AlphaHCoV species (NL63 and 229E) positive compared to HCoV negative cases adjusted for age in months, site of enrolment and for confounding covariates where applicable.

f - *p*-values from regression models comparing BetaHCoV species (OC43 and HKU1) positive compared to HCoV negative cases adjusted for age in months, site of enrolment and for confounding covariates where applicable.

g - HDP defined as *S. pneumoniae* density in nasopharynx  $>6.9 \log_{10}$  copies/mL.

h - HDP defined as *S.pneumoniae* density in whole blood  $>2.2 \log_{10}$  copies/mL.
